# Supplementary material
Source: PubMed Central journal article supplement (PMC3815754)
Supplement: mbt0002-0333-S2.pdf [file mbt0002-0333-S2.pdf]

Supplementary Material, Table 1: List of possible HMOs, their masses, retention times, and compositions

| Mass (exp/1) | Mass (cal/2) | Mass Error (ppm) | RT (min) | Hex   | Hex/Mac | Fuc | Nuc | Intensity | Total Intensity/HMO | % Abundance | Relative % Abundance |       |
|--------------|--------------|------------------|----------|-------|---------|-----|-----|-----------|---------------------|-------------|----------------------|-------|
| 1            | 635.227      | 635.227          | 0.910    | 31.52 | 2       | 0   | 0   | 1         | 15542941            |             |                      |       |
| 2            | 635.227      | 635.227          | 0.120    | 23.31 | 2       | 0   | 0   | 1         | 3297373             |             |                      |       |
| 3            | 636.247      | 636.248          | 0.750    | 27.77 | 2       | 0   | 2   | 0         | 121555              |             |                      |       |
| 4            | 636.248      | 636.248          | 0.500    | 24.41 | 2       | 0   | 2   | 0         | 138076              |             |                      |       |
| 5            | 636.248      | 636.248          | 0.810    | 21.06 | 2       | 0   | 2   | 0         | 4467743             |             |                      |       |
| 6            | 709.263      | 709.264          | 1.190    | 31.56 | 3       | 1   | 0   | 0         | 383842              |             |                      |       |
| 7            | 709.263      | 709.264          | 0.920    | 30.71 | 3       | 1   | 0   | 0         | 71457               |             |                      |       |
| 8            | 709.264      | 709.264          | 0.360    | 18.09 | 3       | 1   | 0   | 0         | 83774               |             |                      |       |
| 9            | 709.265      | 709.264          | 0.900    | 21.01 | 3       | 1   | 0   | 0         | 2874312             |             |                      |       |
| 10           | 709.265      | 709.264          | 1.800    | 31.51 | 3       | 1   | 0   | 0         | 6525444             | 68649025    | 22.22                | 41.87 |
| 11           | 750.290      | 750.291          | 0.140    | 16.84 | 2       | 0   | 0   | 0         | 135501              |             |                      |       |
| 12           | 781.285      | 781.285          | 0.750    | 28.88 | 2       | 0   | 1   | 0         | 422564              |             |                      |       |
| 13           | 855.322      | 855.322          | 1.360    | 22.22 | 3       | 1   | 1   | 0         | 71440               |             |                      |       |
| 14           | 855.321      | 855.322          | 0.770    | 31.02 | 3       | 1   | 1   | 0         | 67035               |             |                      |       |
| 15           | 855.322      | 855.322          | 0.540    | 19.78 | 3       | 1   | 1   | 0         | 24302818            |             |                      |       |
| 16           | 855.322      | 855.322          | 0.070    | 16.59 | 3       | 1   | 1   | 0         | 1761968             |             |                      |       |
| 17           | 855.322      | 855.322          | 0.150    | 15.09 | 3       | 1   | 1   | 0         | 251258              |             |                      |       |
| 18           | 855.323      | 855.322          | 0.270    | 24.59 | 3       | 1   | 1   | 0         | 25131               | 42397580    | 13.72                | 25.86 |
| 19           | 1000.341     | 1000.339         | 1.120    | 24.56 | 3       | 1   | 0   | 1         | 1835422             |             |                      |       |
| 20           | 1000.341     | 1000.339         | 2.020    | 30.66 | 3       | 1   | 0   | 1         | 13397574            |             |                      |       |
| 21           | 1001.378     | 1001.380         | 1.570    | 19.74 | 3       | 1   | 2   | 0         | 221006              |             |                      |       |
| 22           | 1001.380     | 1001.380         | 0.120    | 16.14 | 3       | 1   | 2   | 0         | 5766761             |             |                      |       |
| 23           | 1074.397     | 1074.396         | 0.320    | 27.28 | 4       | 2   | 0   | 0         | 3254245             |             |                      |       |
| 24           | 1074.396     | 1074.396         | 1.710    | 26.83 | 4       | 2   | 0   | 0         | 259112              |             |                      |       |
| 25           | 1074.399     | 1074.396         | 0.180    | 24.76 | 4       | 2   | 0   | 0         | 2144292             |             |                      |       |
| 26           | 1074.400     | 1074.396         | 3.850    | 23.91 | 4       | 2   | 0   | 0         | 3124071             |             |                      |       |
| 27           | 1074.400     | 1074.396         | 5.330    | 20.74 | 4       | 2   | 0   | 0         | 149504              | 8933224     | 2.89                 | 5.45  |
| 28           | 1144.419     | 1144.417         | 1.220    | 32.91 | 3       | 1   | 1   | 1         | 162005              |             |                      |       |
| 29           | 1144.419     | 1144.417         | 1.580    | 29.78 | 3       | 1   | 1   | 1         | 1730208             |             |                      |       |
| 30           | 1144.419     | 1144.417         | 1.660    | 28.09 | 3       | 1   | 1   | 1         | 95741               |             |                      |       |
| 31           | 1144.420     | 1144.417         | 2.710    | 28.94 | 3       | 1   | 1   | 1         | 739462              |             |                      |       |
| 32           | 1220.467     | 1220.454         | 2.640    | 19.56 | 4       | 2   | 1   | 0         | 132091              |             |                      |       |
| 33           | 1220.468     | 1220.454         | 2.980    | 26.44 | 4       | 2   | 0   | 0         | 1234780             |             |                      |       |
| 34           | 1220.458     | 1220.454         | 3.140    | 25.34 | 4       | 2   | 1   | 0         | 242071              |             |                      |       |
| 35           | 1220.459     | 1220.454         | 4.200    | 20.76 | 4       | 2   | 1   | 0         | 3823837             |             |                      |       |
| 36           | 1220.460     | 1220.454         | 4.700    | 23.69 | 4       | 2   | 0   | 0         | 4857376             | 10272105    | 3.33                 | 6.27  |
| 37           | 1365.492     | 1365.492         | 0.460    | 33.07 | 4       | 2   | 0   | 1         | 2421761             |             |                      |       |
| 38           | 1365.493     | 1365.492         | 0.820    | 31.49 | 4       | 2   | 0   | 1         | 12272269            |             |                      |       |
| 39           | 1366.512     | 1366.512         | 0.020    | 18.55 | 4       | 2   | 2   | 0         | 1438059             |             |                      |       |
| 40           | 1366.512     | 1366.512         | 0.240    | 26.04 | 4       | 2   | 2   | 0         | 375671              |             |                      |       |
| 41           | 1366.513     | 1366.512         | 0.600    | 17.90 | 4       | 2   | 2   | 0         | 451349              |             |                      |       |
| 42           | 1366.514     | 1366.512         | 1.110    | 19.62 | 4       | 2   | 2   | 0         | 521818              |             |                      |       |
| 43           | 1366.514     | 1366.512         | 1.550    | 26.89 | 4       | 2   | 2   | 0         | 174909              |             |                      |       |
| 44           | 1366.515     | 1366.512         | 1.990    | 23.41 | 4       | 2   | 2   | 0         | 243830              |             |                      |       |
| 45           | 1366.516     | 1366.512         | 2.140    | 21.64 | 4       | 2   | 2   | 0         | 3658893             |             |                      |       |
| 46           | 1366.520     | 1366.512         | 5.420    | 20.69 | 4       | 2   | 2   | 0         | 308599              | 11813876    | 3.82                 | 7.21  |
| 47           | 1439.529     | 1439.528         | 0.520    | 27.41 | 5       | 3   | 0   | 0         | 1541034             |             |                      |       |
| 48           | 1439.530     | 1439.528         | 0.790    | 27.60 | 5       | 3   | 0   | 0         | 2394409             |             |                      |       |
| 49           | 1439.531     | 1439.528         | 1.560    | 29.26 | 5       | 3   | 0   | 0         | 504490              | 4444964     | 1.44                 | 2.71  |
| 50           | 1511.552     | 1511.550         | 1.330    | 29.90 | 4       | 2   | 1   | 1         | 799112              |             |                      |       |
| 51           | 1511.552     | 1511.550         | 1.330    | 34.10 | 4       | 2   | 1   | 1         | 1649005             |             |                      |       |
| 52           | 1511.552     | 1511.550         | 1.450    | 32.74 | 4       | 2   | 1   | 1         | 538658              |             |                      |       |
| 53           | 1511.552     | 1511.550         | 1.650    | 28.90 | 4       | 2   | 1   | 1         | 3028840             |             |                      |       |
| 54           | 1511.552     | 1511.550         | 1.730    | 31.61 | 4       | 2   | 1   | 1         | 18088512            |             |                      |       |
| 55           | 1512.573     | 1512.570         | 1.730    | 25.46 | 4       | 2   | 3   | 0         | 352601              |             |                      |       |
| 56           | 1512.573     | 1512.570         | 1.860    | 18.32 | 4       | 2   | 3   | 0         | 539814              |             |                      |       |
| 57           | 1512.573     | 1512.570         | 2.060    | 19.52 | 4       | 2   | 3   | 0         | 1665028             |             |                      |       |
| 58           | 1512.574     | 1512.570         | 2.770    | 23.29 | 4       | 2   | 3   | 0         | 149446              |             |                      |       |
| 59           | 1585.589     | 1585.586         | 1.090    | 28.71 | 5       | 3   | 1   | 0         | 123867              |             |                      |       |
| 60           | 1585.589     | 1585.586         | 1.470    | 27.15 | 5       | 3   | 1   | 0         | 1034125             |             |                      |       |
| 61           | 1585.589     | 1585.586         | 1.600    | 26.07 | 5       | 3   | 1   | 0         | 2331095             |             |                      |       |
| 62           | 1585.589     | 1585.586         | 1.720    | 29.04 | 5       | 3   | 1   | 0         | 84584               |             |                      |       |
| 63           | 1585.589     | 1585.586         | 1.850    | 27.14 | 5       | 3   | 1   | 0         | 260977              |             |                      |       |
| 64           | 1585.590     | 1585.586         | 2.290    | 25.44 | 5       | 3   | 1   | 0         | 1440343             |             |                      |       |
| 65           | 1585.590     | 1585.586         | 2.480    | 23.34 | 5       | 3   | 1   | 0         | 403433              |             |                      |       |
| 66           | 1585.591     | 1585.586         | 2.990    | 24.70 | 5       | 3   | 1   | 0         | 3345441             |             |                      |       |
| 67           | 1585.591     | 1585.586         | 2.990    | 26.62 | 5       | 3   | 1   | 0         | 521363              | 9643428     | 3.12                 | 5.88  |
| 68           | 1627.611     | 1627.607         | 1.810    | 29.44 | 4       | 2   | 2   | 1         | 1948912             |             |                      |       |
| 69           | 1627.611     | 1627.607         | 1.870    | 32.44 | 4       | 2   | 2   | 1         | 994091              |             |                      |       |
| 70           | 1658.634     | 1658.628         | 3.680    | 24.12 | 4       | 2   | 4   | 0         | 293881              |             |                      |       |
| 71           | 1730.626     | 1730.624         | 1.390    | 32.80 | 5       | 3   | 0   | 1         | 3094320             |             |                      |       |
| 72           | 1731.643     | 1731.644         | 0.840    | 26.95 | 5       | 3   | 2   | 0         | 131952              |             |                      |       |
| 73           | 1731.643     | 1731.644         | 0.780    | 27.49 | 5       | 3   | 2   | 0         | 123413              |             |                      |       |
| 74           | 1731.645     | 1731.644         | 0.480    | 21.71 | 5       | 3   | 2   | 0         | 184906              |             |                      |       |
| 75           | 1731.646     | 1731.644         | 1.050    | 26.81 | 5       | 3   | 2   | 0         | 615407              |             |                      |       |
| 76           | 1731.647     | 1731.644         | 1.390    | 24.89 | 5       | 3   | 2   | 0         | 2078025             |             |                      |       |
| 77           | 1731.648     | 1731.644         | 2.310    | 24.66 | 5       | 3   | 2   | 0         | 588272              |             |                      |       |
| 78           | 1731.649     | 1731.644         | 3.020    | 23.49 | 5       | 3   | 2   | 0         | 3945636             |             |                      |       |
| 79           | 1731.650     | 1731.644         | 3.540    | 20.54 | 5       | 3   | 2   | 0         | 124422              | 7799223     | 2.52                 | 4.76  |
| 80           | 1804.661     | 1804.661         | 0.410    | 27.62 | 6       | 4   | 0   | 0         | 2165661             |             |                      |       |
| 81           | 1804.662     | 1804.661         | 1.020    | 28.98 | 6       | 4   | 0   | 0         | 489113              |             |                      |       |
| 82           | 1804.663     | 1804.661         | 1.180    | 29.43 | 6       | 4   | 0   | 0         | 200856              |             |                      |       |
| 83           | 1804.665     | 1804.661         | 2.560    | 29.73 | 6       | 4   | 0   | 0         | 47958               |             |                      |       |
| 84           | 1876.682     | 1876.682         | 0.170    | 33.60 | 5       | 3   | 1   | 1         | 435450              |             |                      |       |
| 85           | 1876.682     | 1876.682         | 0.380    | 29.55 | 5       | 3   | 1   | 1         | 137519              |             |                      |       |
| 86           | 1876.683     | 1876.682         | 0.590    | 32.51 | 5       | 3   | 1   | 1         | 676508              |             |                      |       |
| 87           | 1876.684     | 1876.682         | 1.120    | 31.12 | 5       | 3   | 1   | 1         | 1571989             |             |                      |       |
| 88           | 1877.705     | 1877.702         | 1.380    | 20.12 | 5       | 3   | 3   | 0         | 128644              |             |                      |       |
| 89           | 1877.705     | 1877.702         | 1.440    | 21.87 | 5       | 3   | 3   | 0         | 162902              |             |                      |       |
| 90           | 1877.705     | 1877.702         | 1.500    | 23.14 | 5       | 3   | 3   | 0         | 819140              |             |                      |       |
| 91           | 1877.705     | 1877.702         | 1.610    | 25.39 | 5       | 3   | 3   | 0         | 187966              |             |                      |       |
| 92           | 1877.706     | 1877.702         | 2.020    | 24.14 | 5       | 3   | 3   | 0         | 622577              |             |                      |       |
| 93           | 1877.706     | 1877.702         | 2.180    | 19.32 | 5       | 3   | 3   | 0         | 194413              |             |                      |       |
| 94           | 1877.707     | 1877.702         | 2.390    | 18.76 | 5       | 3   | 3   | 0         | 114208              |             |                      |       |
| 95           | 1877.707     | 1877.702         | 2.620    | 21.20 | 5       | 3   | 3   | 0         | 904241              |             |                      |       |
| 96           | 1877.712     | 1877.702         | 5.160    | 20.71 | 5       | 3   | 3   | 0         | 206536              |             |                      |       |
| 97           | 1877.715     | 1877.702         | 6.920    | 22.76 | 5       | 3   | 3   | 0         | 590918              |             |                      |       |
| 98           | 1950.720     | 1950.719         | 0.580    | 27.84 | 6       | 4   | 1   | 0         | 1010923             |             |                      |       |
| 99           | 1950.720     | 1950.719         | 0.830    | 27.21 | 6       | 4   | 1   | 0         | 1801486             |             |                      |       |
| 100          | 1950.721     | 1950.719         | 1.040    | 27.50 | 6       | 4   | 1   | 0         | 1229963             |             |                      |       |
| 101          | 1950.721     | 1950.719         | 1.440    | 27.63 | 6       | 4   | 1   | 0         | 168594              |             |                      |       |
| 102          | 1950.723     | 1950.719         | 2.220    | 26.61 | 6       | 4   | 1   | 0         | 1906334             |             |                      |       |
| 103          | 2022.741     | 2022.740         | 0.650    | 33.04 | 5       | 3   | 2   | 1         | 617970              |             |                      |       |
| 104          | 2022.742     | 2022.740         | 0.990    | 27.88 | 5       | 3   | 2   | 1         | 73015               |             |                      |       |
| 105          | 2022.742     | 2022.740         | 1.340    | 30.45 | 5       | 3   | 2   | 1         | 990479              |             |                      |       |
| 106          | 2022.743     | 2022.740         | 1.380    | 31.14 | 5       | 3   | 2   | 1         | 113477              |             |                      |       |
| 107          | 2022.743     | 2022.740         | 1.540    | 29.07 | 5       | 3   | 2   | 1         | 158412              |             |                      |       |
| 108          | 2022.740     | 2022.740         | 0.190    | 19.29 | 5       | 3   | 4   | 0         | 109187              |             |                      |       |
| 109          | 2023.763     | 2023.760         | 1.380    | 20.35 | 5       | 3   | 4   | 0         | 71895               |             |                      |       |
| 110          | 2023.765     | 2023.760         | 2.220    | 20.99 | 5       | 3   | 4   | 0         | 281045              |             |                      |       |
| 111          | 2023.775     | 2023.760         | 7.450    | 22.73 | 5       | 3   | 4   | 0         | 638091              |             |                      |       |
| 112          | 2095.757     | 2095.756         | 0.440    | 32.62 | 6       | 4   | 0   | 1         | 1274546             |             |                      |       |
| 113          | 2095.760     | 2095.756         | 1.970    | 32.66 | 6       | 4   | 0   | 1         | 161712              |             |                      |       |
| 114          | 2096.779     | 2096.776         | 1.110    | 27.89 | 6       | 4   | 2   | 0         | 83681               |             |                      |       |
| 115          | 2096.779     | 2096.776         | 1.350    | 27.31 | 6       | 4   | 2   | 0         | 410441              |             |                      |       |
| 116          | 2096.780     | 2096.776         | 1.670    | 25.84 | 6       | 4   | 2   | 0         | 145179              |             |                      |       |
| 117          | 2096.780     | 2096.776         | 1.910    | 25.41 | 6       | 4   | 2   | 0         | 336567              |             |                      |       |
| 118          | 2096.781     | 2096.776         | 2.160    | 26.74 | 6       | 4   | 2   | 0         | 152597              |             |                      |       |
| 119          | 2096.784     | 2096.776         | 1.850    | 24.65 |         |     |     |           |                     |             |                      |       |
